# Supplementary material
Source: publisher figshare collection journal article supplement (https://acs.figshare.com/ndownloader/files/14400635)
Supplement: Supplementary file 1 [file 14400635]

# Supporting Information

## Reclaimed Carbon Fiber-Based 2.4 V Aqueous Symmetric Supercapacitors

Yanan Zhou, Zhaoqiang Zhu, Chunhua Zhao,\* Kefu Zhang, Bailing Wang, Chongjun Zhao,\*

Guorong Chen

Key Laboratory for Ultrafine Materials of Ministry of Education, Shanghai Key Laboratory of

Advanced Polymeric Materials, School of Materials Science and Engineering, East China

University of Science and Technology, 130 Meilong Road, Shanghai 200237, P. R. China

### \* Corresponding authors:

E-mail: [chongjunzhao@ecust.edu.cn](mailto:chongjunzhao@ecust.edu.cn) (Chongjun Zhao), [zhaochh@ecust.edu.cn](mailto:zhaochh@ecust.edu.cn)

[\(Chunhua Zhao\)](#).

Tel/Fax: +86-21-6425 0838

Totals – 3 pages and 2 figures

## Content

**Figure S1** Digital photos of RCFs obtained through three different routes.....S2

**Figure S2** SEM images of (a) SRCF, (b) ARCF and (c) NRCF.....S3

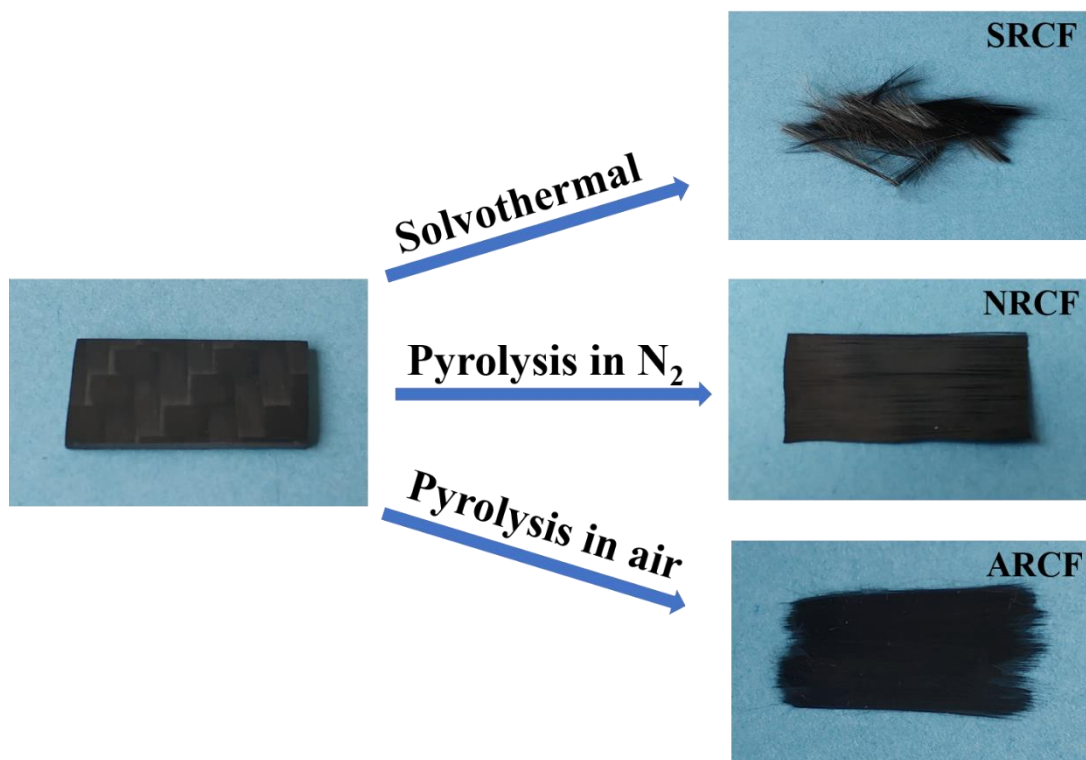

**Figure S1** Digital photos of RCFs obtained through three different routes

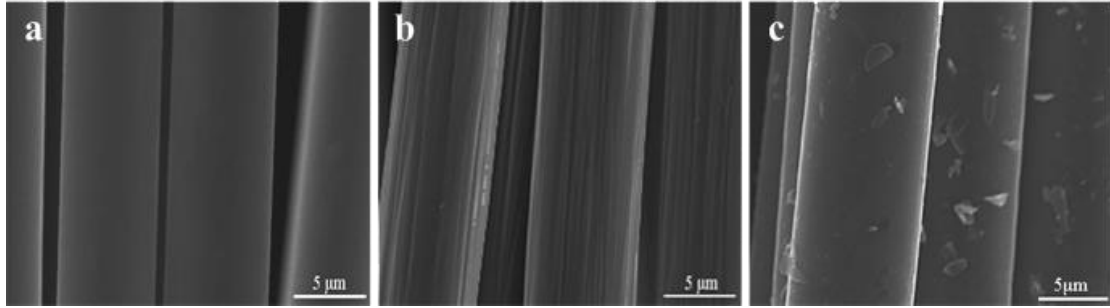

**Figure S2** SEM images of (a) SRCF, (b) ARCF and (c) NRCF
